# Supplementary material for: Heterologous Overexpression of Apple MdKING1 Promotes Fruit Ripening in Tomato
Source: MDPI journal article supplement (doi:10.3390/plants12152848), 2023-08-02
Supplement: s1 [file s1]

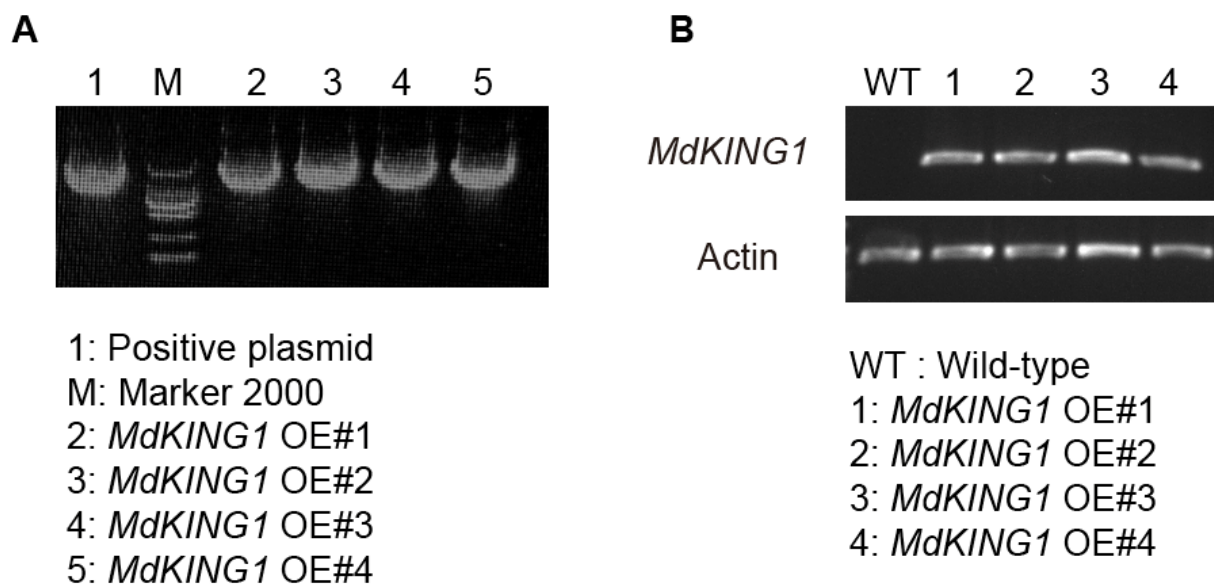

**Supplemental Figure S1 Identification of transgenic tomatoes.** (A) Identification of transgenic tomatoes at DNA level; (B) RT-PCR analysis of *MdKING1* in wild type and *MdKING1* OE plants.

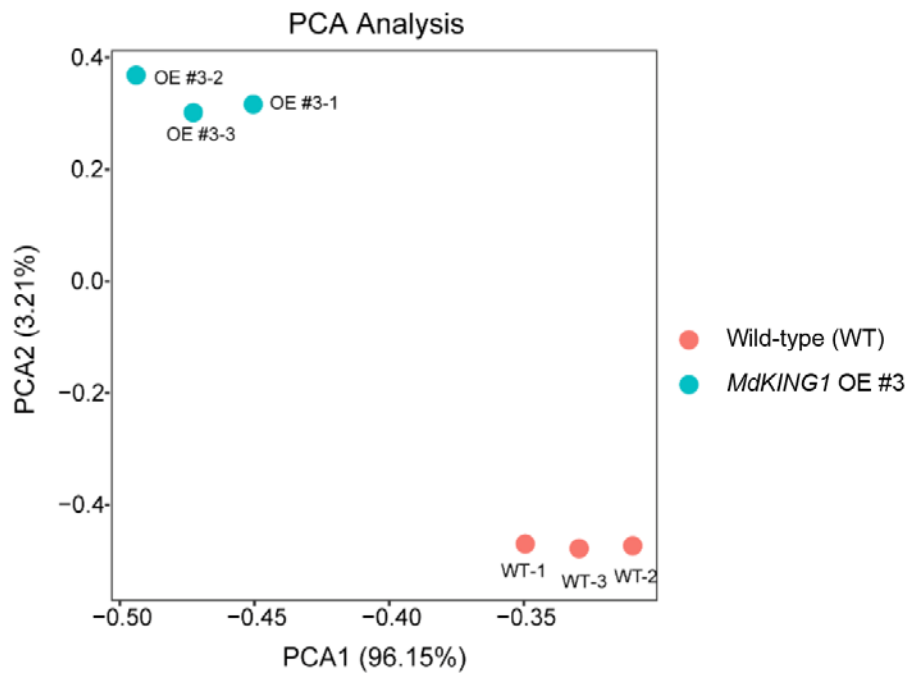

**Supplemental Figure S2 Principal Component Analysis of Transcriptome Data.** WT represents wild-type, and OE #3 represents *MdKING1* OE #3. Each sample has three biological replicates.

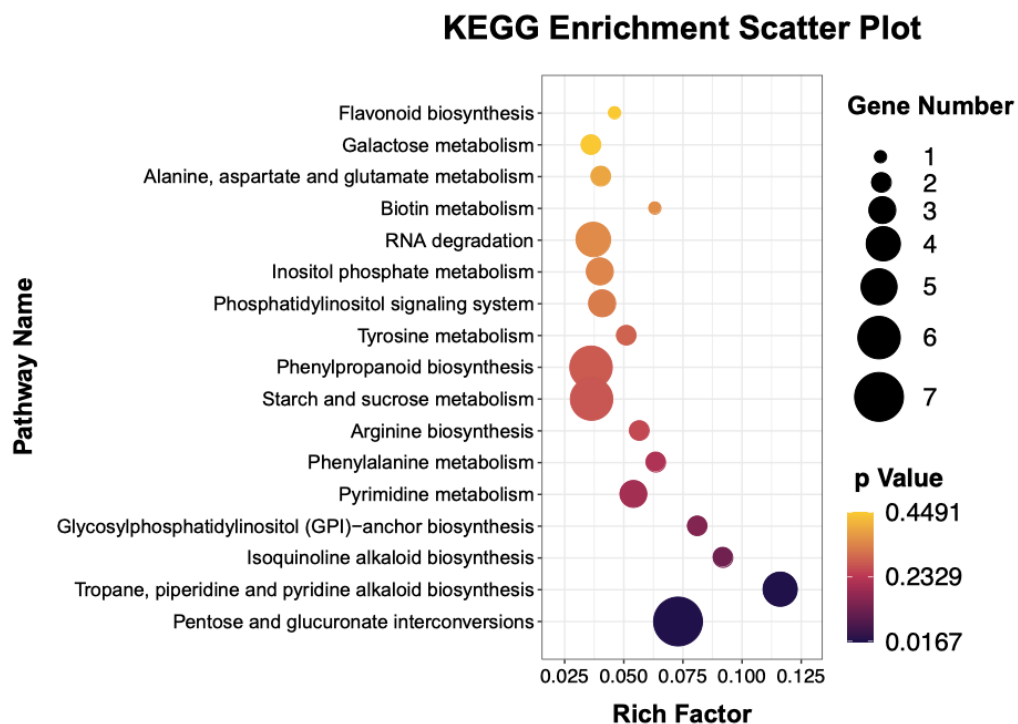

**Supplemental Figure S3 KEGG enrichment analysis of DEGs between wild type and *MdKING1* OE fruits.** The top 16 enriched KEGG pathways were exhibited.

**Supplemental Table S1. Primers used in this study.**

| <b>Name</b>                    | <b>Primer (5' to 3')</b>                          | <b>Purpose</b>      |
|--------------------------------|---------------------------------------------------|---------------------|
| <i>SlActin</i> -qF             | CAGCAGATGTGGATCTCAAA                              | qRT-PCR             |
| <i>SlActin</i> -qR             | CTGTGGACAATGGAAGGAC                               | qRT-PCR             |
| <i>SlACS2</i> -qF              | AAACCCCAACGGAGTTATCC                              | qRT-PCR             |
| <i>SlACS2</i> -qR              | GCAATGGCCTTGAATGATTT                              | qRT-PCR             |
| <i>SlACS4</i> -qF              | TGGATTGCCTGAATTCACAA                              | qRT-PCR             |
| <i>SlACS4</i> -qR              | ATCACCAGGATCAGCCAAAC                              | qRT-PCR             |
| <i>SIPSY1</i> -qF              | GCTAATGACTCCCGAGAGAAGA                            | qRT-PCR             |
| <i>SIPSY1</i> -qR              | CGGGGTAATATATGATGCGTTT                            | qRT-PCR             |
| <i>SIPL</i> -qF                | ATTGGTGGAAGTGCTGATCC                              | qRT-PCR             |
| <i>SIPL</i> -qR                | GTGCATCCTCGTGCTTTGTA                              | qRT-PCR             |
| <i>SlACO1</i> -qF              | ATTCAGCCATCTCTTTGGTGAT                            | qRT-PCR             |
| <i>SlACO1</i> -qR              | ACTTGAACCCTGAACCTGTGTT                            | qRT-PCR             |
| <i>MdKING1</i> -qF             | ACAGATCCATCACGGCGAAG                              | qRT-PCR             |
| <i>MdKING1</i> -qR             | TCCCATCATCGTCCACAACG                              | qRT-PCR             |
| MdKING1-CDS-qF                 | ATGGGTGTGCCGGCGGTGATGAC                           | Gene cloning        |
| MdKING1-CDS-Qr                 | TCAAACCCTGCTGTTTTGGGGCAG<br>CG                    | Gene cloning        |
| <i>MdKING1</i> -pCAMBIA1305-qF | TACCCTCGAGACTAGTGTGACAT<br>GGGTGTGCCGGCGGTGATGAC  | Vector construction |
| <i>MdKING1</i> -pCAMBIA1305-qR | TCCTGCAGGTGGATCCGAATTCA<br>ACCCTGCTGTTTTGGGGCAGCG | Vector construction |
